# Supplementary material
Source: PubMed Central journal article supplement (PMC2838996)
Supplement: NIHMS150408-supplement-01.pdf [file NIHMS150408-supplement-01.pdf]

**Supplementary Table.** Learning assay percent correct data and modeled probability data for each treatment. Each value = culmination of data from 10 fish for each exposure regimen.

A mathematical model for learning was devised to measure the probability P of a correct response as a function of the variable trial number as previously published and briefly described in the Materials and Methods.

| MeHg  |       | 0      |      | 0.01   |      | 0.03   |       | 0.06   |      | 0.1    |      | 0.3    |       | 0      |       | 0      |      | 0      |       | 0      |       | 0.1    |       | 0.03   |       | 0.03   |      | 0.03   |       | 0.03   |       | 0.1    |       | 0.1    |       | 0.1    |       |      |
|-------|-------|--------|------|--------|------|--------|-------|--------|------|--------|------|--------|-------|--------|-------|--------|------|--------|-------|--------|-------|--------|-------|--------|-------|--------|------|--------|-------|--------|-------|--------|-------|--------|-------|--------|-------|------|
| SeMet |       | 0      |      | 0      |      | 0      |       | 0      |      | 0      |      | 0.01   |       | 0.03   |       | 0.06   |      | 0.1    |       | 0.3    |       | 0.3    |       | 0.03   |       | 0.06   |      | 0.1    |       | 0.3    |       | 0.03   |       | 0.06   |       | 0.1    |       |      |
| trial | obs.  | fitted | obs. | fitted | obs. | fitted | obs.  | fitted | obs. | fitted | obs. | fitted | obs.  | fitted | obs.  | fitted | obs. | fitted | obs.  | fitted | obs.  | fitted | obs.  | fitted | obs.  | fitted | obs. | fitted | obs.  | fitted | obs.  | fitted | obs.  | fitted | obs.  | fitted |       |      |
| 1     | 50.0  | 50.0   | 44.4 | 50.1   | 44.4 | 50.0   | 40.0  | 50.0   | 50.0 | 50.0   | 50.0 | 50.0   | 40.0  | 52.4   | 40.0  | 50.0   | 20.0 | 50.0   | 40.0  | 50.0   | 20.0  | 50.0   | 80.0  | 50.0   | 40.0  | 50.0   | 60.0 | 50.0   | 40.0  | 51.7   | 25.0  | 50.0   | 80.0  | 50.0   | 25.0  | 50.0   | 20.0  | 50.0 |
| 2     | 70.0  | 50.0   | 44.4 | 52.7   | 66.7 | 50.0   | 60.0  | 50.0   | 70.0 | 50.0   | 60.0 | 50.0   | 80.0  | 63.5   | 40.0  | 50.0   | 80.0 | 50.0   | 60.0  | 50.0   | 40.0  | 50.0   | 60.0  | 50.0   | 20.0  | 50.0   | 20.0 | 50.0   | 80.0  | 56.9   | 50.0  | 50.0   | 40.0  | 50.4   | 75.0  | 50.0   | 100.0 | 50.0 |
| 3     | 50.0  | 50.1   | 55.6 | 57.5   | 33.3 | 50.0   | 20.0  | 50.0   | 40.0 | 50.0   | 10.0 | 50.0   | 40.0  | 65.5   | 40.0  | 50.0   | 80.0 | 50.3   | 40.0  | 50.0   | 60.0  | 50.1   | 80.0  | 50.0   | 40.0  | 50.0   | 40.0 | 50.0   | 60.0  | 57.5   | 75.0  | 50.0   | 40.0  | 52.3   | 25.0  | 50.0   | 0.0   | 50.0 |
| 4     | 50.0  | 50.5   | 88.9 | 59.4   | 88.9 | 50.0   | 60.0  | 50.1   | 50.0 | 50.0   | 30.0 | 50.0   | 80.0  | 65.8   | 60.0  | 50.0   | 40.0 | 51.0   | 80.0  | 50.0   | 40.0  | 50.4   | 100.0 | 50.0   | 80.0  | 50.0   | 80.0 | 50.0   | 80.0  | 57.6   | 50.0  | 50.0   | 60.0  | 55.1   | 50.0  | 50.0   | 60.0  | 50.1 |
| 5     | 50.0  | 51.4   | 44.4 | 60.0   | 22.2 | 50.0   | 50.0  | 50.3   | 50.0 | 50.0   | 30.0 | 50.0   | 60.0  | 65.9   | 0.0   | 50.0   | 40.0 | 52.7   | 60.0  | 50.0   | 40.0  | 51.1   | 40.0  | 50.0   | 80.0  | 50.0   | 60.0 | 50.0   | 20.0  | 57.6   | 50.0  | 50.1   | 60.0  | 56.9   | 25.0  | 50.0   | 60.0  | 50.3 |
| 6     | 70.0  | 53.3   | 88.9 | 60.2   | 44.4 | 50.0   | 50.0  | 50.5   | 80.0 | 50.0   | 70.0 | 50.0   | 80.0  | 65.9   | 80.0  | 50.0   | 60.0 | 55.3   | 100.0 | 50.0   | 80.0  | 52.3   | 80.0  | 50.0   | 20.0  | 50.0   | 60.0 | 50.0   | 80.0  | 57.6   | 75.0  | 50.2   | 80.0  | 57.7   | 75.0  | 50.0   | 40.0  | 50.6 |
| 7     | 30.0  | 56.4   | 44.4 | 60.2   | 33.3 | 50.0   | 40.0  | 50.7   | 40.0 | 50.0   | 30.0 | 50.0   | 40.0  | 65.9   | 60.0  | 50.1   | 60.0 | 58.0   | 20.0  | 50.1   | 20.0  | 54.1   | 40.0  | 50.0   | 60.0  | 50.1   | 20.0 | 50.0   | 0.0   | 57.6   | 100.0 | 50.4   | 60.0  | 58.0   | 50.0  | 50.1   | 40.0  | 51.3 |
| 8     | 90.0  | 60.4   | 55.6 | 60.2   | 44.4 | 50.0   | 60.0  | 50.8   | 70.0 | 50.0   | 70.0 | 50.0   | 80.0  | 65.9   | 80.0  | 50.1   | 60.0 | 60.2   | 80.0  | 50.2   | 80.0  | 56.1   | 60.0  | 50.0   | 60.0  | 50.2   | 20.0 | 50.1   | 100.0 | 57.6   | 50.0  | 50.7   | 60.0  | 58.2   | 75.0  | 50.1   | 60.0  | 52.2 |
| 9     | 50.0  | 64.8   | 55.6 | 60.3   | 44.4 | 50.0   | 50.0  | 50.9   | 30.0 | 50.1   | 40.0 | 50.0   | 60.0  | 65.9   | 60.0  | 50.3   | 60.0 | 61.7   | 60.0  | 50.3   | 40.0  | 57.8   | 60.0  | 50.0   | 60.0  | 50.3   | 60.0 | 50.1   | 40.0  | 57.6   | 50.0  | 51.2   | 20.0  | 58.2   | 0.0   | 50.2   | 60.0  | 53.3 |
| 10    | 70.0  | 68.3   | 44.4 | 60.3   | 55.6 | 50.0   | 70.0  | 50.9   | 70.0 | 50.1   | 60.0 | 50.1   | 80.0  | 65.9   | 40.0  | 50.4   | 60.0 | 62.7   | 80.0  | 50.5   | 100.0 | 59.1   | 60.0  | 50.1   | 40.0  | 50.5   | 60.0 | 50.2   | 60.0  | 57.6   | 75.0  | 51.9   | 80.0  | 58.3   | 75.0  | 50.3   | 60.0  | 54.5 |
| 11    | 60.0  | 72.0   | 66.7 | 60.3   | 22.2 | 50.1   | 30.0  | 50.9   | 30.0 | 50.2   | 60.0 | 50.1   | 80.0  | 65.9   | 80.0  | 50.7   | 60.0 | 63.3   | 80.0  | 50.8   | 40.0  | 60.0   | 60.0  | 50.1   | 40.0  | 50.8   | 60.0 | 50.3   | 40.0  | 57.6   | 25.0  | 53.0   | 40.0  | 58.3   | 25.0  | 50.5   | 20.0  | 55.6 |
| 12    | 80.0  | 74.5   | 55.6 | 60.3   | 55.6 | 50.1   | 80.0  | 50.9   | 50.0 | 50.2   | 60.0 | 50.2   | 20.0  | 65.9   | 60.0  | 51.0   | 80.0 | 63.6   | 40.0  | 51.2   | 40.0  | 60.7   | 40.0  | 50.1   | 80.0  | 51.1   | 40.0 | 50.5   | 100.0 | 57.6   | 50.0  | 54.2   | 60.0  | 58.3   | 25.0  | 50.8   | 80.0  | 56.5 |
| 13    | 80.0  | 76.2   | 55.6 | 60.3   | 22.2 | 50.1   | 30.0  | 50.9   | 50.0 | 50.4   | 30.0 | 50.2   | 100.0 | 65.9   | 60.0  | 51.5   | 80.0 | 63.9   | 40.0  | 51.7   | 40.0  | 61.1   | 40.0  | 50.2   | 20.0  | 51.7   | 60.0 | 50.7   | 40.0  | 57.6   | 50.0  | 55.7   | 40.0  | 58.3   | 0.0   | 51.2   | 60.0  | 57.2 |
| 14    | 90.0  | 77.5   | 66.7 | 60.3   | 55.6 | 50.2   | 70.0  | 50.9   | 50.0 | 50.5   | 50.0 | 50.3   | 80.0  | 65.9   | 20.0  | 52.2   | 60.0 | 64.0   | 60.0  | 52.5   | 80.0  | 61.4   | 40.0  | 50.3   | 0.0   | 52.3   | 60.0 | 51.1   | 80.0  | 57.6   | 25.0  | 57.3   | 60.0  | 58.3   | 50.0  | 51.6   | 80.0  | 57.7 |
| 15    | 70.0  | 78.4   | 66.7 | 60.3   | 55.6 | 50.3   | 50.0  | 51.0   | 40.0 | 50.7   | 30.0 | 50.5   | 100.0 | 65.9   | 60.0  | 53.0   | 80.0 | 64.1   | 60.0  | 53.4   | 60.0  | 61.6   | 80.0  | 50.4   | 40.0  | 53.2   | 80.0 | 51.5   | 40.0  | 57.6   | 75.0  | 58.9   | 40.0  | 58.3   | 25.0  | 52.1   | 40.0  | 58.1 |
| 16    | 80.0  | 79.0   | 66.7 | 60.3   | 66.7 | 50.4   | 100.0 | 51.0   | 70.0 | 51.0   | 50.0 | 50.7   | 80.0  | 65.9   | 60.0  | 54.1   | 40.0 | 64.2   | 80.0  | 54.6   | 80.0  | 61.7   | 40.0  | 50.5   | 80.0  | 54.2   | 20.0 | 52.0   | 80.0  | 57.6   | 75.0  | 60.5   | 100.0 | 58.3   | 75.0  | 52.7   | 60.0  | 58.3 |
| 17    | 90.0  | 79.4   | 55.6 | 60.3   | 44.4 | 50.5   | 10.0  | 51.0   | 30.0 | 51.3   | 20.0 | 50.9   | 60.0  | 65.9   | 60.0  | 55.4   | 60.0 | 64.2   | 40.0  | 56.0   | 60.0  | 61.8   | 20.0  | 50.7   | 100.0 | 55.4   | 20.0 | 52.7   | 0.0   | 57.6   | 75.0  | 62.0   | 60.0  | 58.3   | 25.0  | 53.4   | 40.0  | 58.5 |
| 18    | 90.0  | 79.7   | 44.4 | 60.3   | 66.7 | 50.7   | 70.0  | 51.0   | 50.0 | 51.8   | 80.0 | 51.2   | 60.0  | 65.9   | 80.0  | 56.9   | 80.0 | 64.3   | 100.0 | 57.7   | 80.0  | 61.8   | 40.0  | 51.0   | 60.0  | 56.7   | 80.0 | 53.6   | 100.0 | 57.6   | 50.0  | 63.2   | 80.0  | 58.3   | 75.0  | 54.1   | 80.0  | 58.7 |
| 19    | 50.0  | 80.0   | 55.6 | 60.3   | 22.2 | 50.9   | 10.0  | 51.0   | 40.0 | 52.3   | 50.0 | 51.5   | 40.0  | 65.9   | 40.0  | 58.7   | 80.0 | 64.3   | 0.0   | 59.6   | 40.0  | 61.9   | 40.0  | 51.3   | 60.0  | 58.1   | 60.0 | 54.6   | 20.0  | 57.6   | 75.0  | 64.3   | 60.0  | 58.3   | 50.0  | 54.8   | 40.0  | 58.8 |
| 20    | 90.0  | 80.2   | 55.6 | 60.3   | 55.6 | 51.1   | 60.0  | 51.0   | 90.0 | 52.9   | 30.0 | 51.9   | 60.0  | 65.9   | 40.0  | 60.7   | 80.0 | 64.3   | 100.0 | 61.8   | 80.0  | 61.9   | 80.0  | 51.6   | 40.0  | 59.5   | 60.0 | 55.8   | 80.0  | 57.6   | 75.0  | 65.3   | 40.0  | 58.3   | 75.0  | 55.5   | 60.0  | 58.9 |
| 21    | 70.0  | 80.3   | 66.7 | 60.3   | 44.4 | 51.5   | 60.0  | 51.0   | 20.0 | 53.7   | 50.0 | 52.4   | 60.0  | 65.9   | 60.0  | 62.9   | 60.0 | 64.3   | 40.0  | 64.1   | 40.0  | 62.0   | 40.0  | 52.1   | 40.0  | 61.0   | 60.0 | 57.1   | 60.0  | 57.6   | 75.0  | 66.0   | 40.0  | 58.3   | 50.0  | 56.2   | 60.0  | 58.9 |
| 22    | 80.0  | 80.4   | 88.9 | 60.3   | 44.4 | 51.8   | 70.0  | 51.0   | 60.0 | 54.6   | 60.0 | 53.0   | 40.0  | 65.9   | 60.0  | 65.3   | 60.0 | 64.3   | 60.0  | 66.6   | 80.0  | 62.0   | 60.0  | 52.6   | 60.0  | 62.4   | 60.0 | 58.7   | 100.0 | 57.6   | 75.0  | 66.7   | 80.0  | 58.3   | 100.0 | 56.8   | 60.0  | 59.0 |
| 23    | 70.0  | 80.5   | 66.7 | 60.3   | 22.2 | 52.3   | 30.0  | 51.0   | 50.0 | 55.6   | 50.0 | 53.7   | 60.0  | 65.9   | 60.0  | 67.7   | 60.0 | 64.4   | 60.0  | 69.1   | 40.0  | 62.0   | 20.0  | 53.2   | 100.0 | 63.8   | 60.0 | 60.4   | 20.0  | 57.6   | 50.0  | 67.2   | 40.0  | 58.3   | 25.0  | 57.4   | 60.0  | 59.0 |
| 24    | 80.0  | 80.5   | 66.7 | 60.3   | 77.8 | 52.8   | 60.0  | 51.0   | 60.0 | 56.7   | 60.0 | 54.6   | 80.0  | 65.9   | 80.0  | 70.2   | 20.0 | 64.4   | 80.0  | 71.7   | 80.0  | 62.0   | 80.0  | 53.9   | 60.0  | 65.1   | 20.0 | 62.2   | 40.0  | 57.6   | 50.0  | 67.6   | 100.0 | 58.3   | 100.0 | 57.9   | 60.0  | 59.0 |
| 25    | 70.0  | 80.6   | 66.7 | 60.3   | 55.6 | 53.3   | 10.0  | 51.0   | 30.0 | 58.0   | 50.0 | 55.5   | 80.0  | 65.9   | 60.0  | 72.7   | 60.0 | 64.4   | 60.0  | 74.2   | 20.0  | 62.0   | 40.0  | 54.6   | 60.0  | 66.2   | 80.0 | 64.2   | 40.0  | 57.6   | 50.0  | 67.9   | 0.0   | 58.3   | 75.0  | 58.3   | 60.0  | 59.1 |
| 26    | 90.0  | 80.6   | 66.7 | 60.3   | 66.7 | 54.0   | 70.0  | 51.0   | 80.0 | 59.4   | 60.0 | 56.5   | 60.0  | 65.9   | 80.0  | 75.2   | 80.0 | 64.4   | 80.0  | 76.7   | 80.0  | 62.0   | 60.0  | 55.5   | 60.0  | 67.3   | 80.0 | 66.3   | 80.0  | 57.6   | 50.0  | 68.2   | 80.0  | 58.3   | 50.0  | 58.7   | 60.0  | 59.1 |
| 27    | 80.0  | 80.6   | 66.7 | 60.3   | 11.1 | 54.8   | 30.0  | 51.0   | 40.0 | 60.9   | 50.0 | 57.6   | 60.0  | 65.9   | 100.0 | 77.5   | 60.0 | 64.4   | 80.0  | 79.0   | 40.0  | 62.0   | 40.0  | 56.5   | 60.0  | 68.3   | 60.0 | 68.4   | 60.0  | 57.6   | 100.0 | 68.4   | 40.0  | 58.3   | 25.0  | 59.0   | 60.0  | 59.1 |
| 28    | 100.0 | 80.6   | 66.7 | 60.3   | 88.9 | 55.6   | 60.0  | 51.0   | 90.0 | 62.6   | 70.0 | 58.9   |       |        | 80.0  | 79.7   | 60.0 | 64.4   | 100.0 | 81.2   | 100.0 | 62.0   | 80.0  | 57.6   | 80.0  | 69.1   | 80.0 | 70.6   | 60.0  | 57.6   | 75.0  | 68.6   | 80.0  | 58.3   | 50.0  | 59.3   | 60.0  | 59.1 |
